# Supplementary material
Source: ML conference proceedings conference paper supplement (https://openaccess.thecvf.com/content/ICCV2023/html/Chen_AREA_Adaptive_Reweighting_ICCV_2023_paper.html)
Supplement: Supplementary file 1 [file Chen_AREA_Adaptive_Reweighting_ICCV_2023_supplemental.pdf]

# AREA: Adaptive Reweighting via Effective Area for Long-Tailed Classification

Xiaohua Chen<sup>1,2</sup>    Yucan Zhou<sup>1\*</sup>    Dayan Wu<sup>1</sup>    Chule Yang<sup>3</sup>  
Bo Li<sup>1,2</sup>    Qinghua Hu<sup>4</sup>    Weiping Wang<sup>1,2</sup>

<sup>1</sup>Institute of Information Engineering, Chinese Academy of Sciences, Beijing, China

<sup>2</sup>School of Cyber Security, University of Chinese Academy of Sciences, Beijing, China

<sup>3</sup>Defense Innovation Institute, Military Academy of Sciences    <sup>4</sup>Tianjin University

{chenxiaohua, zhouyucan, wudayan, libo, wangweiping}@iie.ac.cn

yangchule@126.com    huqinghua@tju.edu.cn

## A. Appendix

### A.1. $N$ -Based Weight vs $N^{eff}$ -Based Weight on CIFAR-100

We also draw the  $N^{eff}$ -based weights of the CIFAR-100-LT under different imbalance ratios  $\lambda \in \{200, 50, 20, 10\}$ . The results are shown in Figure 1 - 4, respectively. The “Original\_weight” means  $N$ -based weights.

### A.2. Effective Area on CIFAR-100-LT

We draw the effective area  $N^{eff}$  of the CIFAR-100-LT under different imbalance ratios  $\lambda \in \{200, 100, 50, 20\}$ . The results of CIFAR-100-LT are shown in Figure 5 - 8. The “Original” means the statistical number  $N$ . To explicitly exhibit the difference between  $N$  and  $N^{eff}$ , we take the results on CIFAR-100-LT with  $\lambda = 100$  (shown in Figure 5) as an example, and obtain the following observations:

Firstly, the effective area can be larger, smaller, and equal to the original sample number. For example, the  $N$  of “Apple” are 500 while the  $N^{eff}$  is larger than the 616.28. For “Lion”, the  $N^{eff}$  is 64.87, which is smaller than  $N$ . For the tail class, the  $N$  is near to the  $N^{eff}$ .

Secondly, the effective area distribution varies in different training epochs, i.e.,  $N^{eff}$  can be adaptively adjusted. This is because as the training procedure proceeded, the features are optimized. Correspondingly, the correlations of samples are updated, resulting in the changeable effective area. Besides,  $N^{eff}$  is more flexible as it is a real number.

Thirdly, the category with more samples usually has a larger  $N^{eff}$  than  $N$ . For example, the “Apple” and “Cloud” are both head categories ( $N > 100$ ). The  $N^{eff}$  of “Apple” and “Cloud” are larger than the  $N$  116.28 (616.28-500) and 16.42 (187.42-171), respectively. We argue that it is because the category “Apple” has sufficient samples with rich

diversity, such as more backgrounds, angles, colors, etc.

### A.3. Effective Area on Balanced CIFAR-10/100

We use ResNet-32 as our backbone, which is trained by SGD with a momentum of 0.9 and a weight decay  $1 \times 10^{-4}$ . We train the model 160 epochs with batch size 64. The initial learning rate is 0.1, and the linear warm-up learning rate schedule is adopted. Besides, we decay the learning rate by 0.1 at the 80<sup>th</sup> and 120<sup>th</sup> epoch.

As shown in Figure 9, we draw  $N^{eff}$  with different epochs on balanced CIFAR-10 and CIFAR-100. Specifically, for balanced CIFAR-100, we draw the  $N^{eff}$  in epoch=180,190 and reorder the categories according to the size of  $N^{eff}$ . We can see that statistically balanced data sets may be imbalanced in the feature space.

\*Corresponding author

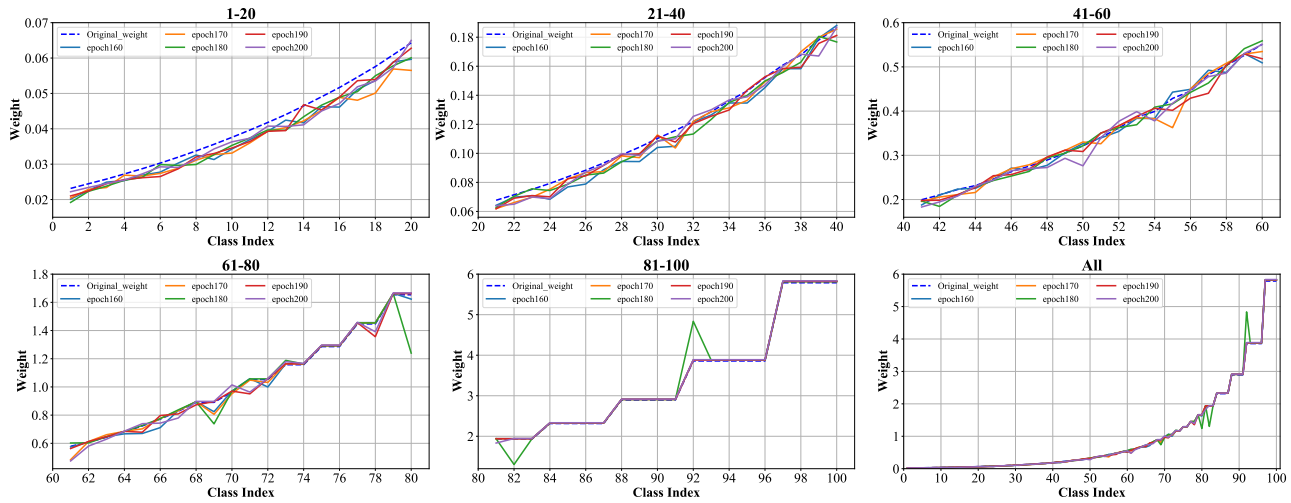

Figure 1.  $N$ -based weights vs  $N^{eff}$ -based weights on CIFAR-100-LT with  $\lambda=200$ .

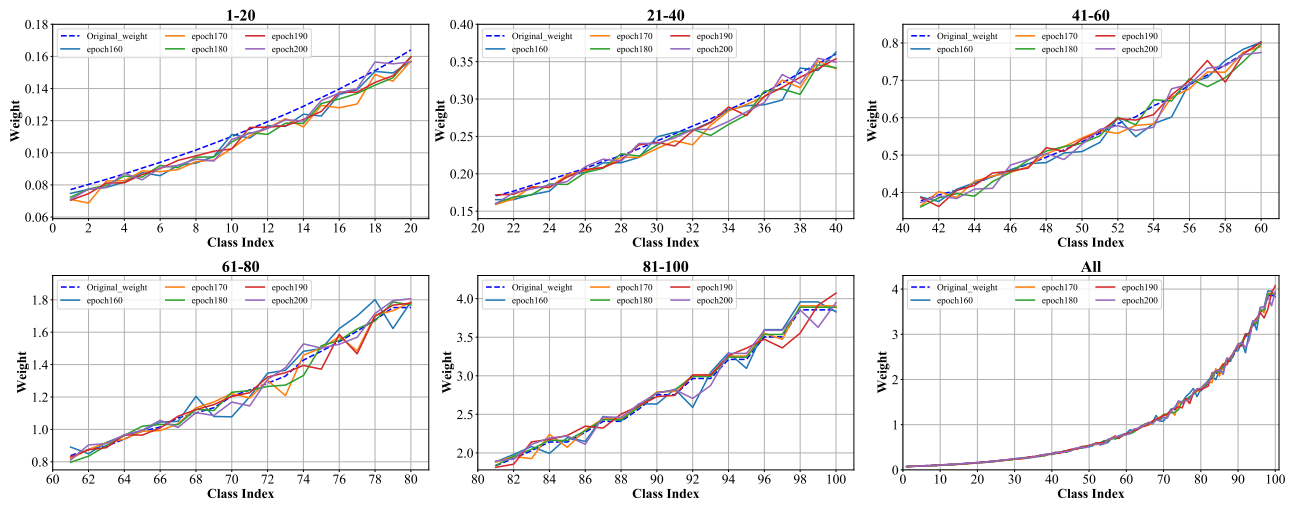

Figure 2.  $N$ -based weights vs  $N^{eff}$ -based weights on CIFAR-100-LT with  $\lambda=50$ .

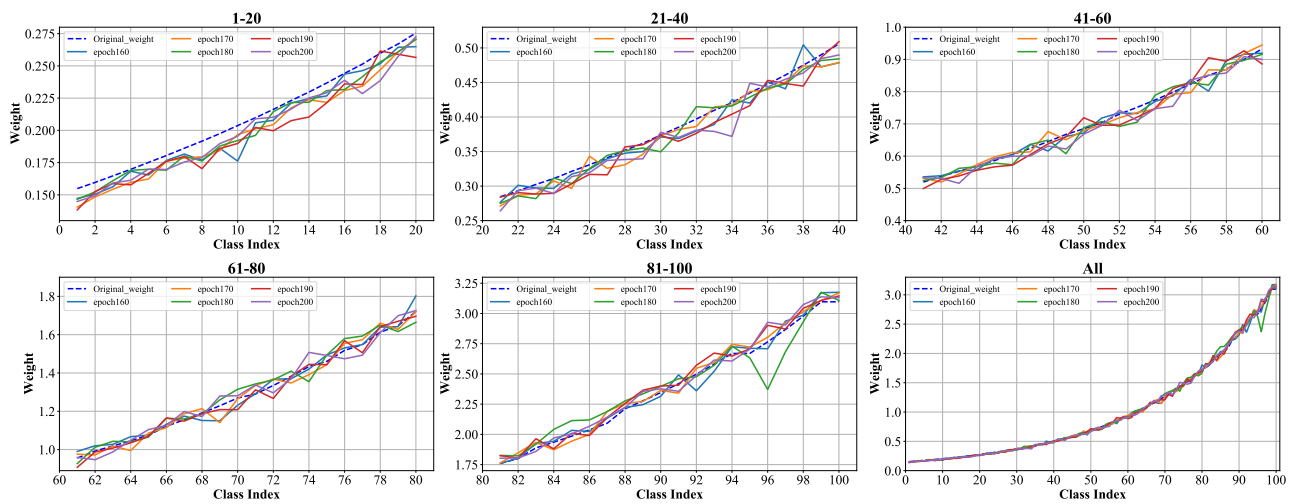

Figure 3.  $N$ -based weights vs  $N^{eff}$ -based weights on CIFAR-100-LT with  $\lambda=20$ .

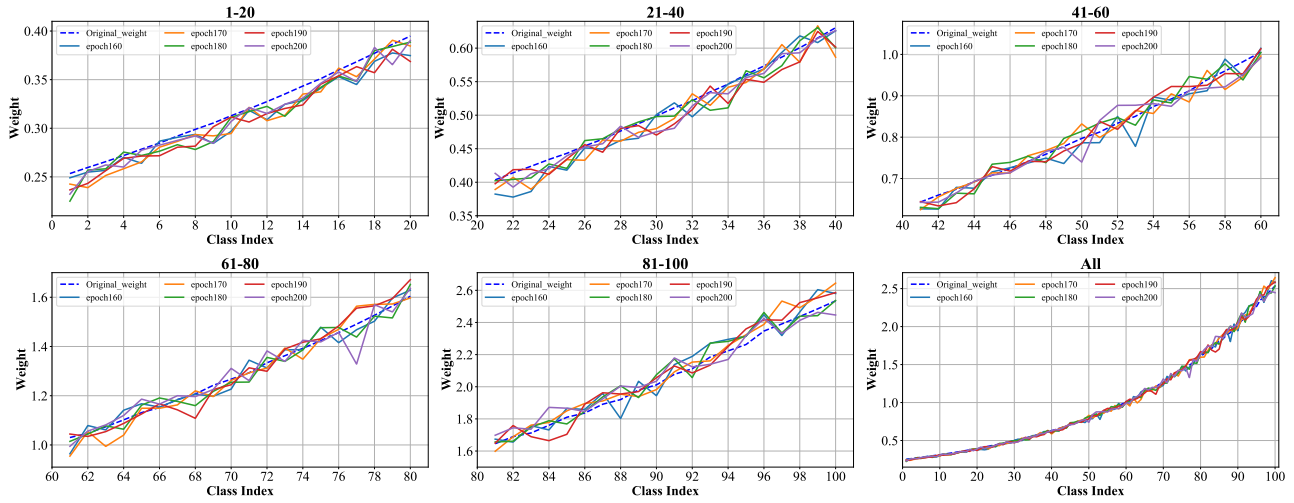

Figure 4.  $N$ -based weights vs  $N^{eff}$ -based weights on CIFAR-100-LT with  $\lambda=10$ .

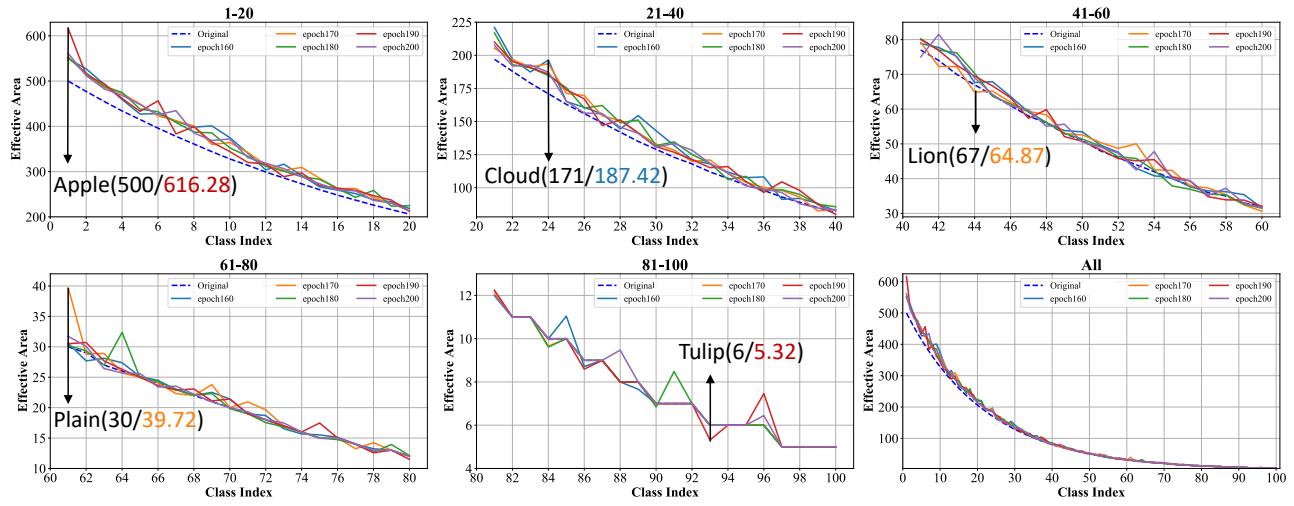

Figure 5. Effective area  $N^{eff}$  in different epochs on CIFAR-100-LT with  $\lambda=10$ .

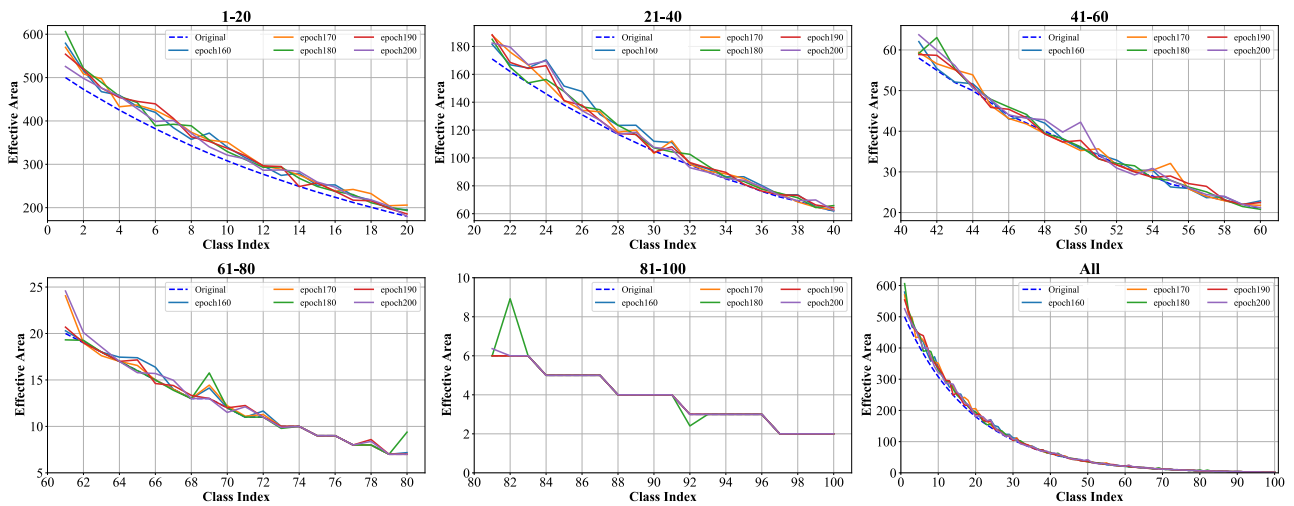

Figure 6. Effective area  $N^{eff}$  in different epochs on CIFAR-100-LT with  $\lambda=200$ .

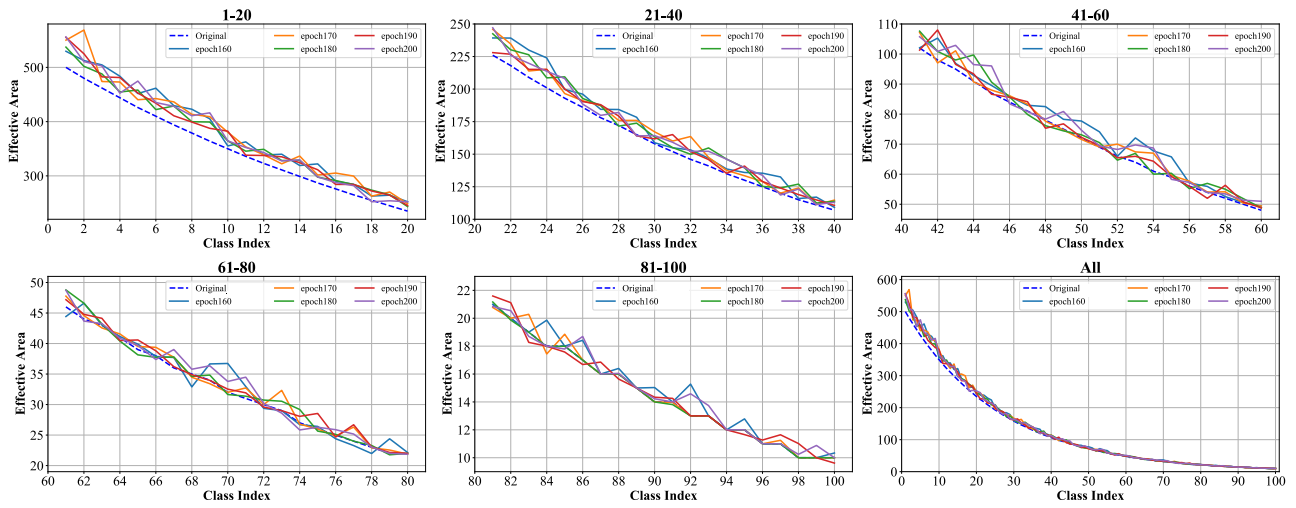

Figure 7. Effective area in different epochs on CIFAR-100-LT with  $\lambda=50$ .

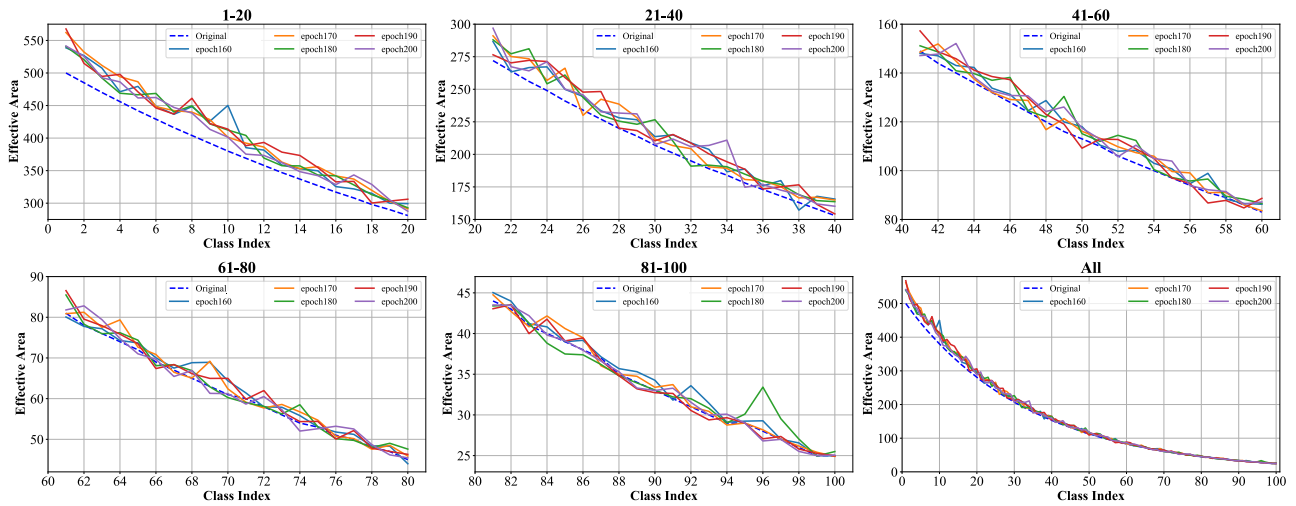

Figure 8. Effective area  $N^{eff}$  in different epochs on CIFAR-100-LT with  $\lambda=20$ .

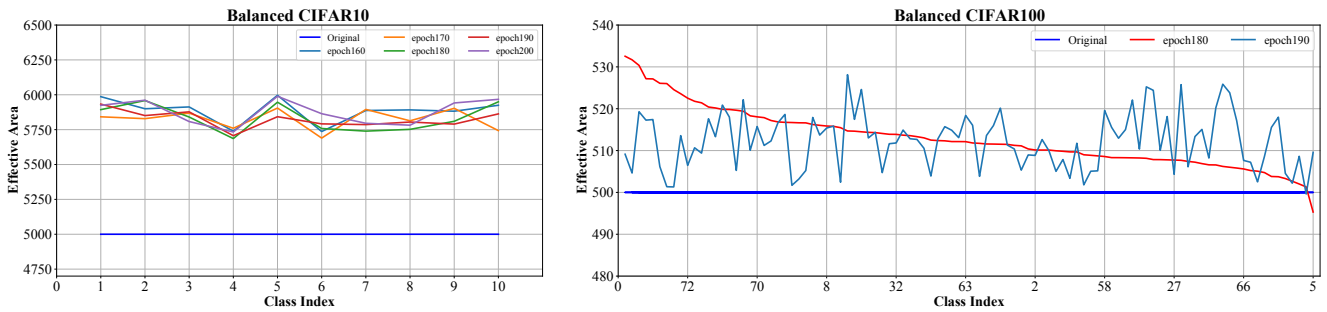

Figure 9. Effective area  $N^{eff}$  on balanced CIFAR-10 and CIFAR-100.
